# Supplementary material for: Report of One-Year Prospective Surveillance of SARS-CoV-2 in Dogs and Cats in France with Various Exposure Risks: Confirmation of a Low Prevalence of Shedding, Detection and Complete Sequencing of an Alpha Variant in a Cat
Source: MDPI journal article supplement (doi:10.3390/v13091759), 2021-09-03
Supplement: s1 [file Table S1.pdf › Table S1.pdf]

Table S1 : Hematology and biochemistry exams performed on A1+ and S+ cats

| Parameter                             | Results |        | Reference interval |
|---------------------------------------|---------|--------|--------------------|
|                                       | A1+ cat | S+ cat |                    |
| WBC ( $\times 10^9/L$ )               | 6.3     | 8.1    | 5.5–19.5           |
| Lym ( $\times 10^9/L$ )               | 0.5 *   | 4.9    | 1.2–10.4           |
| Mon ( $\times 10^9/L$ )               | 0.1     | 0.1    | 0.1–0.8            |
| Gran ( $\times 10^9/L$ )              | 5.6     | 2.8    | 1.4–9.6            |
| RBC ( $\times 10^{12}/L$ )            | 9.3     | 8.7    | 5–10               |
| HGB (g/dL)                            | 13.3    | 13.2   | 8–15               |
| HCT (%)                               | 40.2    | 43.9   | 24–45              |
| MCV ( $\mu^3$ )                       | 43.4    | 50.2 * | 33–48              |
| MCH (pg)                              | 14.4    | 15.1   | 13–17              |
| MCHC (g/dL)                           | 33.1    | 30.1 * | 31–36              |
| PLT ( $\times 10^9/L$ )               | 401     | 263    | 230–680            |
| Urea (mmol/L)                         | 9.1     | 9.3    | 4–11               |
| Creatinine ( $\mu\text{mol}/L$ )      | 101     | 125    | 50–140             |
| ALP (UI/L)                            | 15      | 13     | 1–100              |
| ALT (UI/L)                            | 66 *    | 68 *   | 16–60              |
| Total bilirubin ( $\mu\text{mol}/L$ ) | 1.5     |        | 1–6                |
| Glucose (mmol/L)                      | 4.9     |        | 3–8                |
| TP (g/L)                              | 68      | 69     | 54–79              |
| Albumin (g/L)                         | 30      | 31     | 29–39              |
| Globulins (g/L)                       | 38      | 39     | 29–47              |
| SAA (mg/L)                            | 1.6     | 8.1    | 0–12               |
| Troponin I (ng/mL)                    |         | 0.07   | 0–0.09             |
| EXTEM CT (s)                          | 64 *    |        | 34–52              |
| EXTEM CFT (s)                         | 49      |        | 41–260             |
| EXTEM $\alpha$ angle ( $^\circ$ )     | 80      |        | 59–82              |
| EXTEM MCF (mm)                        | 72      |        | 39–75              |
| EXTEM ML (%)                          | 19      |        | 0–23               |

\* considered non-significant

Gran, granulocytes; HCT, haematocrit; HGB, haemoglobin; Lym, lymphocytes; MCH, mean corpuscular haemoglobin; MCHC, mean corpuscular haemoglobin concentration; MCV, mean corpuscular volume; Mon, monocytes; MPV, mean platelet volume; PLT, platelets; RBC, red blood cells; WBC, white blood cells; ALP, alkaline phosphatase; ALT, alanine aminotransferase; TP, total proteins; SAA, serum amyloid A; EXTEM, extrinsic pathways rotational thromboelastometry; CT, clotting time; CFT, clot formation time; ML, maximum lysis.
